# Supplementary material for: Development of a SEM-EDS-XRD Protocol for the Physicochemical and Automated Mineralogical Characterisation of Coal Dust Particles
Source: MDPI journal article supplement (doi:10.3390/resources11120114), 2022-12-05
Supplement: s1 [file s1]

Archive with 2 entries (2 files):
- resources-2044655-supplementary material 1.pdf
- Supplementary data __Development of an Auto_SEM_EDS protocol.xlsx
