# Supplementary material for: Development of a SEM-EDS-XRD Protocol for the Physicochemical and Automated Mineralogical Characterisation of Coal Dust Particles
Source: MDPI journal article supplement (doi:10.3390/resources11120114), 2022-12-05
Supplement: s1 [file s1 › Supplementary data __Development of an Auto_SEM_EDS protocol.xlsx]

## Sheet: Information sheet
Table of contents
The workbook presented provides the data and calculations for:
Sheet 1: The phase abundance information derived from the QEMSCAN & the 95 % confidence limits
Sheet 2: The estimation of CM content for the XRD analysis
Sheet 3: The determination of the 95 % confidence intervals for the liberation data

## Sheet: 1.Mineral distributions
			Measured					Replicate
Abundance Mass %	Minerals	Density	Br-Dis	SA-UF2	Br-PyC	Mz-ROM1		Br-Dis	SA-UF2	Br-PyC	Mz-ROM2
	CM	1.3	10.096	50.878	32.763	73.833		14.431	34.867	29.591	73.756
	Clays	2.6	62.72	36.252	3.083	14.042		59.652	42.81	4.371	13.137
	Quartz	2.62	17.76	8.337	7.264	7.481		16.032	12.858	8.249	7.99
	Gibbsite	2.34	0	0	0	0		0	0	0	0
	Other Silicates	4.69	0	0	0.007	0		0	0.003	0	0
	Pyrite	5.01	6.243	1.013	29.775	0.673		7.08	1.558	32.53	1.823
	Other Sulfides	4.41	0.066	0.11	0.08	0.009		0.119	0.151	0.04	0.055
	Iron oxides	3.72	0.053	0.364	0.016	0.008		0.049	0.075	0.029	0.066
	Rutile	4.25	1.139	0.615	0.18	0		0.739	1.72	0.034	0.48
	Dolomite	2.84	0.006	0.005	0	0.867		0	0.02	0	0.61
	Siderite	3.99	0.246	1.249	0.05	0.3		0.182	0.992	0.032	0.492
	Calcite	2.71	0.921	0.335	0.105	1.978		0.884	1.556	0.855	0.508
	Sulfates	2.37	0.407	0.537	26.103	0.615		0.437	2.461	23.928	0.579
	Others	2.62	0.343	0.305	0.573	0.195		0.393	0.929	0.341	0.503
		Measured
Precison error (Van der Plas & Tobi, 1965) 95 % confidence		Br-Dis	SA-UF2	Br-PyC	Mz-ROM1		Proportion MOI (p)					1-p					2σ 95 % confidence
	Background	2590	511	1171	110		Br-Dis	SA-UF2	Br-PyC	Mz-ROM1		Br-Dis	SA-UF2	Br-PyC	Mz-ROM1		Br-Dis	SA-UF2	Br-PyC	Mz-ROM1
	CM	55192	22458	110211	24384		18.9904	68.071	50.4666	81.8722		81.0096	31.929	49.5334	18.1278		0.189164	0.667333	0.278172	0.580403
	Clays	171430	8001	5585	2494		58.9854	24.2513	2.55742	8.3739		41.0146	75.7487	97.4426	91.6261		0.474432	1.22703	0.175658	0.834628
	Quartz	48172	1826	13057	2173		16.575	5.53468	5.97892	7.29611		83.425	94.4653	94.0211	92.7039		0.361439	0.659643	0.265855	0.789663
	Gibbsite	0	0	1	0		0	0	0.000457909	0		100	100	99.9995	100		0	0	0.00214301	0
	Other Silicates	0	0	7	0		0	0	0.00320536	0		100	100	99.9968	100		0	0	0.0113638	0
	Pyrite	8856	116	35056	62		3.04716	0.3516	16.0525	0.208172		96.9528	99.6484	83.9475	99.7918		0.319466	0.32653	0.787104	0.264632
	Other Sulfides	86	15	90	1		0.0295908	0.0454656	0.0412118	0.00335762		99.9704	99.9545	99.9588	99.9966		0.0281392	0.103516	0.0383071	0.0296137
	Iron oxides	80	40	15	1		0.0275263	0.121242	0.00686864	0.00335762		99.9725	99.8788	99.9931	99.9966		0.0228937	0.142538	0.0131942	0.0249803
	Rutile	1905	83	199	0		0.65547	0.251576	0.0911239	0		99.3445	99.7484	99.9089	100		0.127232	0.234424	0.0548816	0
	Dolomite	14	1	0	141		0.0048171	0.00303104	0	0.473424		99.9952	99.997	100	99.5266		0.0073124	0.017216	0	0.225922
	Siderite	442	181	59	35		0.152083	0.548618	0.0270166	0.117517		99.8479	99.4514	99.973	99.8825		0.0576822	0.324518	0.028064	0.158421
	Calcite	2414	71	183	337		0.830607	0.215204	0.0837973	1.13152		99.1694	99.7848	99.9162	98.8685		0.0912462	0.138278	0.03356	0.332181
	Sulfates	1120	134	52902	121		0.385368	0.406159	24.2243	0.406272		99.6146	99.5938	75.7757	99.5937		0.0544762	0.165973	0.434569	0.17471
	Others	920	66	1019	34		0.316553	0.200048	0.466609	0.114159		99.6834	99.8	99.5334	99.8858		0.0546003	0.128902	0.0764156	0.102531
	sum	290631	32992	218384	29783
		Replicate
							Proportion MOI (p)					1-p					2σ 95 % confidence
	Mineral Name	Br-Dis	SA-UF2	Br-PyC	Mz-ROM2		BR-HS-C	ZA-W-L-UF	BR-HS-F	Mz-ROM2		BR-HS-C	ZA-W-L-UF	BR-HS-F	Mz-ROM2		BR-HS-C	ZA-W-L-UF	BR-HS-F	Mz-ROM2
	Background	2410	546	375	138		26.1392	52.3734	47.0216	82.0846		73.8608	47.6266	52.9784	17.9154		0.198656	0.36775	0.446446	0.454885
	CM	51151	38639	23508	23335		54.0235	32.1527	3.74045	7.86197		45.9765	67.8473	96.2596	92.138		0.225324	0.343912	0.169729	0.319258
	Clays	105717	23721	1870	2235		14.4087	9.58306	7.00484	7.78458		85.5913	90.4169	92.9952	92.2154		0.158773	0.216745	0.228297	0.317816
	Quartz	28196	7070	3502	2213		0	0	0	0		100	100	100	100		0	0	0	0
	Gibbsite	0	0	0	0		0	0.00135545	0	0		100	99.9986	100	100		0	0.00271089	0	0
	Other Silicates	0	1	0	0		3.32776	0.607244	18.0922	0.566343		96.6722	99.3928	81.9078	99.4337		0.0810916	0.0572046	0.344333	0.089015
	Pyrite	6512	448	9045	161		0.0470139	0.0718391	0.0120014	0.021106		99.953	99.9282	99.988	99.9789		0.00980076	0.0197286	0.00979855	0.0172311
	Other Sulfides	92	53	6	6		0.026573	0.0393082	0.0120014	0.0281413		99.9734	99.9607	99.988	99.9719		0.00736906	0.0145958	0.00979855	0.0198961
	Iron oxides	52	29	6	8		0.409327	0.79023	0.0180022	0.175883		99.5907	99.2098	99.982	99.8241		0.0288665	0.0651968	0.0120004	0.0497034
	Rutile	801	583	9	50		0	0.0135545	0	0.334178		100	99.9864	100	99.6658		0	0.00857206	0	0.0684571
	Dolomite	0	10	0	95		0.108336	0.489319	0.0180022	0.193471		99.8917	99.5107	99.982	99.8065		0.0148731	0.0513811	0.0120004	0.0521248
	Siderite	212	361	9	55		0.768063	1.12096	0.702084	0.291966		99.2319	98.879	99.2979	99.708		0.0394706	0.0775211	0.0746854	0.0640012
	Calcite	1503	827	351	83		0.391952	2.07249	23.0928	0.362319		99.608	97.9275	76.9072	99.6377		0.0282496	0.104899	0.376958	0.0712712
	Sulfates	767	1529	11545	103		0.349538	0.684504	0.286034	0.295483		99.6505	99.3155	99.714	99.7045		0.0266831	0.0607112	0.0477703	0.0643844
	Others	684	505	143	84
	sum	195687	73776	49994	28428

## Sheet: 2.CM estimate for XRD analysis
	Output list									Volatile contribution							QXRD reference list
		Br-Dis	Br-PyC	Mz-ROM1	Mz-ROM2	SA-UF2					% CO2	% S	% H2O					Br-Dis	Br-PyC	Mz-ROM1	Mz-ROM2	SA-UF2
	CM	16.9345	33.2544	75.9659	75.1454	55.2019				CO2 in calcite	0.4397						Quartz	19.81	9.39	21.42	20.83	18.55
	Quartz	16.4553	6.26741	5.1481	5.17721	8.31004				CO2 in Dolomite	0.4773						Kaolinite	33.48	8.75	36.76	34.85	61.21
	Kaolinite	27.8103	5.84024	8.83494	8.66183	27.4209				S in Gypsum		0.1862	0.2093				Illite / Muscovite	29.28	0	23.03	22.15	10.74
	Illite / Muscovite	24.3216	0	5.53505	5.50529	4.81131				S in Anhydrite		0.2355					Plagioclase	2.87	0	0	0
	Plagioclase	2.38398	0	0	0	0				S in Jarosite		0.1281	0.1079				Amphibole	0	0.94	0	0
	Amphibole	0	0.627409	0	0	0				S in Szomolnokite		0.1281	0.1079				Pyrite	5.65	35.93	0.95	1.22	1.16
	Pyrite	4.6932	23.9817	0.228324	0.303226	0.519658				S in Alunogen		0.1484	0.4723				Gibbsite	2.38	2.56	0	0
	Gibbsite	1.97696	1.70869	0	0	0				S in Rhomboclase		0.1998	0.2525				Calcite	1.85	0.23	3.28	5.65	0
	Calcite	1.53671	0.153515	0.788318	1.40429	0				S in Voltaite		0.1896	0.1598				Dolomite	0	0	1.93	1.5	0
	Dolomite	0	0	0.463858	0.372819	0				H2O in Kaolinite			0.1396				Gypsum	2.08	0	0	0	3.22
	Gypsum	1.72776	0	0	0	1.4425				H2O in Illite			0.1203				Anhydrite	0	0.11	0.05	0.04
	Anhydrite	0	0.0734202	0.0120171	0.00994184	0				S in Pyrite		0.5345					Jarosite	0	0	0	0
	Jarosite	0	0	0	0	0											szomolnokite	0	9.93	5.94	7.32
	szomolnokite	0	6.62784	1.42763	1.81936	0											Alunogen	0	2.31	0	0
	Alunogen	0	1.54182	0	0	0											Spinel	0.39	0	0	0
	Spinel	0.323956	0	0	0	0											Rutile	0.75	0	0	0.46	5.12
	Rutile	0.622992	0	0	0.114331	2.29366											Anatase	1.47	0	0	0
	Anatase	1.22106	0	0	0	0											Rhomboclase	0	28.94	0	0
	Rhomboclase	0	19.3162	0	0	0											Voltaite	0	0.91	0	0
	Voltaite	0	0.607385	0	0	0											K-Na sulfate	0	0	0.02	0.02
	K-Na sulfate	0	0	0.00480682	0.00497092	0											Sulfur	0	0	6.61	5.96
	Sulfur	0	0	1.58865	1.48133	0											sum	100.01	100	99.99	100	100
	sum	100.008	100	99.9976	100	100
																	Volatile % contribution	4.65601	36.5164	10.8995	11.554	1.89353
																	Ash %	79.198	42.3725	21.4145	21.9829	43.9498
																	Minerals proportion	83.0655	66.7456	24.0341	24.8546	44.7981
																	CM	16.9345	33.2544	75.9659	75.1454	55.2019

## Sheet: 3.Lib & Conf. Intervals
	Liberation clays					No of particles containing clays
Clays	Combined volume	Fully encapsulated	Mostly encapsulated	Moderatly liberated	Liberated	Particle with no clays	Total particles containing clays	Fully encapsulated	Mostly encapsulated	Moderatly liberated	Liberated
Br-Dis	24.12	16.03	6	1.98	0.11	1367.27	1966.73	1307.07	489.235	161.448	8.96932
SA-UF2	13.94	6.39	4.68	2.31	0.56	955.965	306.035	140.284	102.743	50.7131	12.2941
Br-PyC	1.19	0.03	0.33	0.5	0.33	4555.32	119.68	3.01714	33.1886	50.2857	33.1886
Mz-ROM1	5.4	1.17	2.31	1.63	0.29	1048.25	95.7528	20.7464	40.9609	28.9032	5.14228
Mz-ROM2	5.05	0.94	2.58	1.13	0.4	1082.64	92.355	17.1908	47.1833	20.6656	7.31525
	Liberation quartz					No of particles containing quartz
Quartz	Combined volme	Fully encapsulated	Mostly encapsulated	Moderatly liberated	Liberated	Particle with no quartz	Total particles containing quartz	Fully encapsulated	Mostly encapsulated	Moderatly liberated	Liberated
Br-Dis	6.78	1.49	2.03	2.46	0.8	2781.56	552.444	121.407	165.407	200.444	65.1851
SA-UF2	3.18	1.46	0.56	0.68	0.48	1192.21	69.7886	32.0413	12.2898	14.9233	10.5341
Br-PyC	2.77	0.85	0.54	0.91	0.48	4395.43	279.565	85.7871	54.5	91.8427	48.4445
Mz-ROM1	4.71	2.13	1.23	0.74	0.6	1060.49	83.512	37.7666	21.8089	13.1208	10.6385
Mz-ROM2	5	2.52	0.97	1.05	0.47	1083.59	91.415	46.0732	17.7345	19.1972	8.59301
	Liberation pyrite					No of particles containing pyrite
Pyrite	Combined volume	Fully encapsulated	Mostly encapsulated	Moderatly liberated	Liberated	Particle with no pyrite	Total particles containing pyrite	Fully encapsulated	Mostly encapsulated	Moderatly liberated	Liberated
Br-Dis	1.25	0.16	0.46	0.43	0.2	3232.31	101.687	13.0159	37.4208	34.9803	16.2699
SA-UF2	0.2	0.07	0.1	0.02	0	1257.58	4.417	1.54595	2.2085	0.4417	0
Br-PyC	7.44	0.03	1.55	5.31	0.55	3924.66	750.337	3.02555	156.32	535.523	55.4685
Mz-ROM1	0.13	0	0.06	0.03	0.05	1141.6	2.4024	0	1.1088	0.5544	0.924
Mz-ROM2	0.36	0	0.14	0.11	0.12	1168.3	6.6975	0	2.60458	2.04646	2.2325
				Paramter	Description
				YC	The cumulative liberation yield as a proportion, at a composition C
				N0	Number of particles having a composition < C
				N1	Number of particles having a composition of at least C
	CL: Clays						CL: Quartz					CL: Pyrite
	Composition class	0	0.1	0.4	0.7	1	0	0.1	0.4	0.7	1	0	0.1	0.4	0.7	1
Br-Dis	N0	-	1367.27	2674.35	3163.58	3325.03	-	2781.56	2902.96	3068.37	3268.81	-	3232.31	3245.33	3282.75	3317.73
SA-UF2		-	955.965	1096.25	1198.99	1249.71	-	1192.21	1224.25	1236.54	1251.47	-	1257.58	1259.13	1261.34	1261.78
Br-PyC		-	4555.32	4558.34	4591.53	4641.81	-	4395.43	4481.22	4535.72	4627.56	-	3924.66	3927.69	4084.01	4619.53
Mz-ROM1		-	1048.25	1068.99	1109.95	1138.86	-	1060.49	1098.25	1120.06	1133.18	-	1141.6	1141.6	1142.71	1143.26
Mz-ROM2		-	1082.64	1099.84	1147.02	1167.68	-	1083.59	1129.66	1147.39	1166.59	-	1168.3	1168.3	1170.91	1172.95
Br-Dis	N1	-	1966.73	659.652	170.417	8.96932	-	552.444	431.037	265.629	65.1851	-	101.687	88.6711	51.2502	16.2699
SA-UF2		-	306.035	165.751	63.0072	12.2941	-	69.7886	37.7473	25.4575	10.5341	-	4.19615	2.6502	0.4417	0
Br-PyC		-	119.68	116.663	83.4743	33.1886	-	280.574	194.787	140.287	48.4445	-	750.337	747.312	590.992	55.4685
Mz-ROM1		-	95.7528	75.0064	34.0454	5.14228	-	83.3347	45.5681	23.7593	10.6385	-	2.5872	2.5872	1.4784	0.924
Mz-ROM2		-	92.355	75.1642	27.9808	7.31525	-	91.5978	45.5247	27.7902	8.59301	-	6.88354	6.88354	4.27896	2.2325
Br-Dis	Yield	0	0.664594	0.248756	0.0820896	0.00456053	0	0.219764	0.29941	0.362832	0.117994	0	0.128	0.368	0.344	0.16
SA-UF2		0	0.458393	0.335725	0.16571	0.0401722	0	0.459119	0.176101	0.213836	0.150943	0	0.35	0.5	0.1	0
Br-PyC		0	0.0252101	0.277311	0.420168	0.277311	0	0.306859	0.194946	0.32852	0.173285	0	0.00403226	0.208333	0.71371	0.0739247
Mz-ROM1		0	0.216667	0.427778	0.301852	0.0537037	0	0.452229	0.261146	0.157113	0.127389	0	0	0.461538	0.230769	0.384615
Mz-ROM2		0	0.186139	0.510891	0.223762	0.0792079	0	0.504	0.194	0.21	0.094	0	0	0.388889	0.305556	0.333333
Br-Dis	Cumulative yield (YC)	1	1	0.335406	0.0866501	0.00456053	1	1	0.780236	0.480826	0.117994	1	1	0.872	0.504	0.16
SA-UF2		1	1	0.541607	0.205882	0.0401722	1	1	0.540881	0.36478	0.150943	1	1	0.65	0.15	0.05
Br-PyC		1	1	0.97479	0.697479	0.277311	1	1	0.693141	0.498195	0.169675	1	1	0.995968	0.787634	0.0739247
Mz-ROM1		1	1	0.783333	0.355556	0.0537037	1	1	0.547771	0.286624	0.129512	1	1	1	0.538462	0.307692
Mz-ROM2		1	1	0.813861	0.30297	0.0792079	1	1	0.496	0.302	0.092	1	1	1	0.611111	0.305556
Br-Dis	Var (YC)	-	0	0.000117381	4.84168e-05	2.87992e-06	-	0	9.79231e-05	0.000318635	0.000211836	-	0	0.000180421	0.00154798	0.00139459
SA-UF2		-	0	0.000535118	0.000558175	0.000152652	-	0	0.00210507	0.00269064	0.00196541	-	0	0.0244629	0.0460209	#DIV/0!
Br-PyC		-	0	6.63626e-06	0.000678821	0.00152354	-	0	0.000302935	0.000574103	0.000517513	-	0	3.211e-08	6.77394e-05	0.000106886
Mz-ROM1		-	0	0.000513736	0.00198682	0.000630629	-	0	0.00175315	0.00224624	0.00150741	-	0	0	0.0522883	0.0614357
Mz-ROM2		-	0	0.00040774	0.00204089	0.000914647	-	0	0.00178503	0.00204709	0.00102258	-	0	0	0.0165595	0.025258
			Fully encapsulated	Mostly encapsulated	Moderatly liberated	Liberated		Fully encapsulated	Mostly encapsulated	Moderatly liberated	Liberated		Fully encapsulated	Mostly encapsulated	Moderatly liberated	Liberated
Br-Dis	YC (95% CI)		0	0.0212351	0.0136381	0.00332619		0	0.0193954	0.0349867	0.028527		0	0.0263269	0.0771151	0.0731947
SA-UF2			0	0.0453399	0.0463064	0.0242163		0	0.0899268	0.101668	0.0868926		0	0.306556	0.420469	#DIV/0!
Br-PyC			0	0.00504914	0.0510662	0.0765037		0	0.0341139	0.0469625	0.0445878		0	0.000351217	0.0161316	0.0202636
Mz-ROM1			0	0.0444249	0.0873645	0.0492201		0	0.0820665	0.0928932	0.0760979		0	0	0.448186	0.48581
Mz-ROM2			0	0.0395774	0.0885454	0.0592765		0	0.0828093	0.0886798	0.0626766		0	0	0.25222	0.311498
